# Supplementary material for: Excited-state intramolecular proton transfer in a bioactive flavonoid provides fluorescence observables for recognizing its engagement with target proteins
Source: Royal Society of Chemistry journal article supplement (doi:10.1039/c9pp00026g), 2019-03-18
Supplement: c9pp00026g1.pdf [file c9pp00026g1.pdf]

## Electronic supplementary information

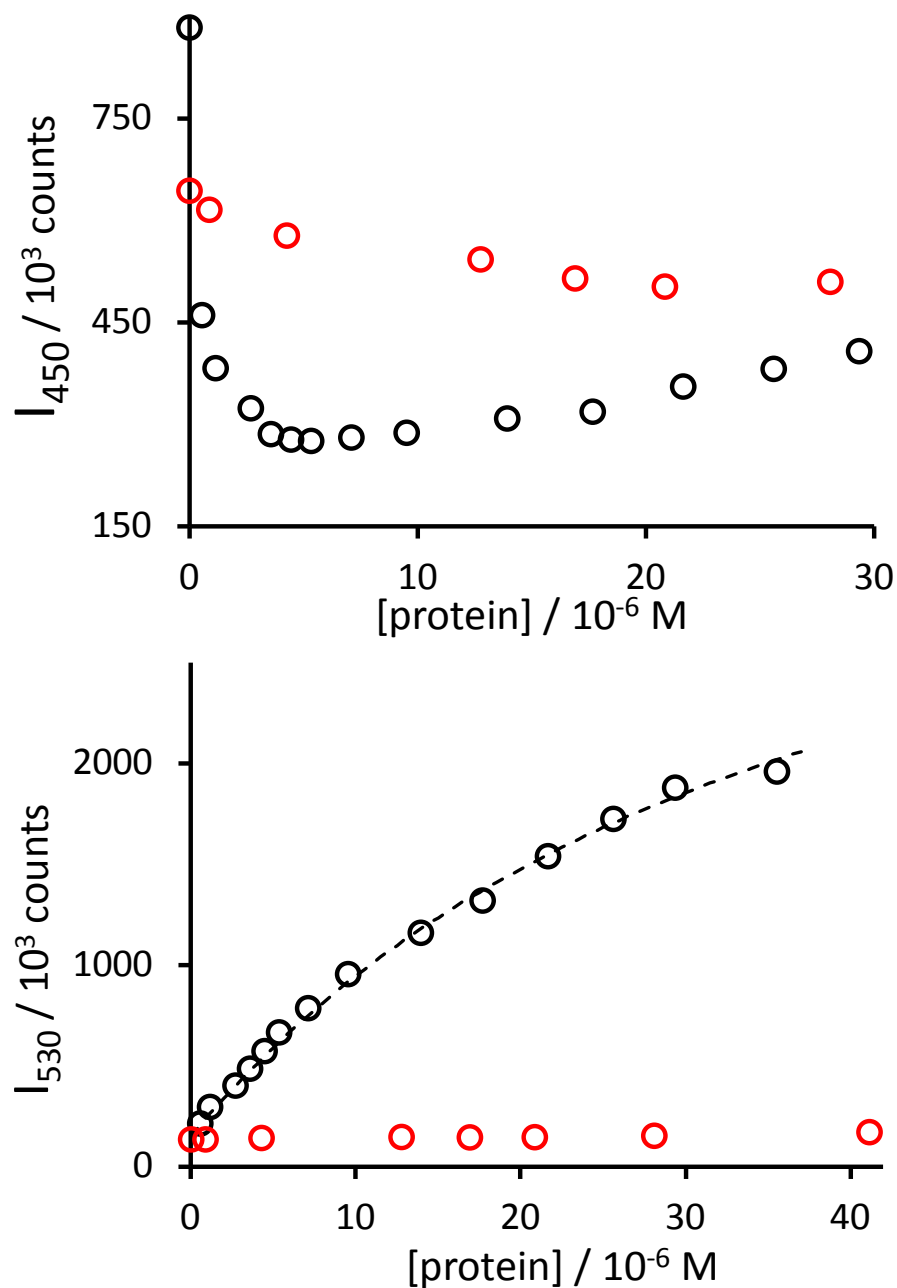

**Fig. S1** Emission intensities of compound CHBT at 450 (top) and 530 nm (bottom) as functions of the concentrations of BSA (black circles) and pepsin (red circles).  $[CHBT] = 5 \mu M$ . The dashed curve shows the emission intensity at 530 nm recalculated under the assumption of a 1:1 CHBT/BSA binding stoichiometry, a binding equilibrium constant  $K_b = 3 \times 10^4 M^{-1}$  and an emission intensity  $750 \times 10^3$  counts at a  $1 \mu M$  CHBT/BSA complex concentration.

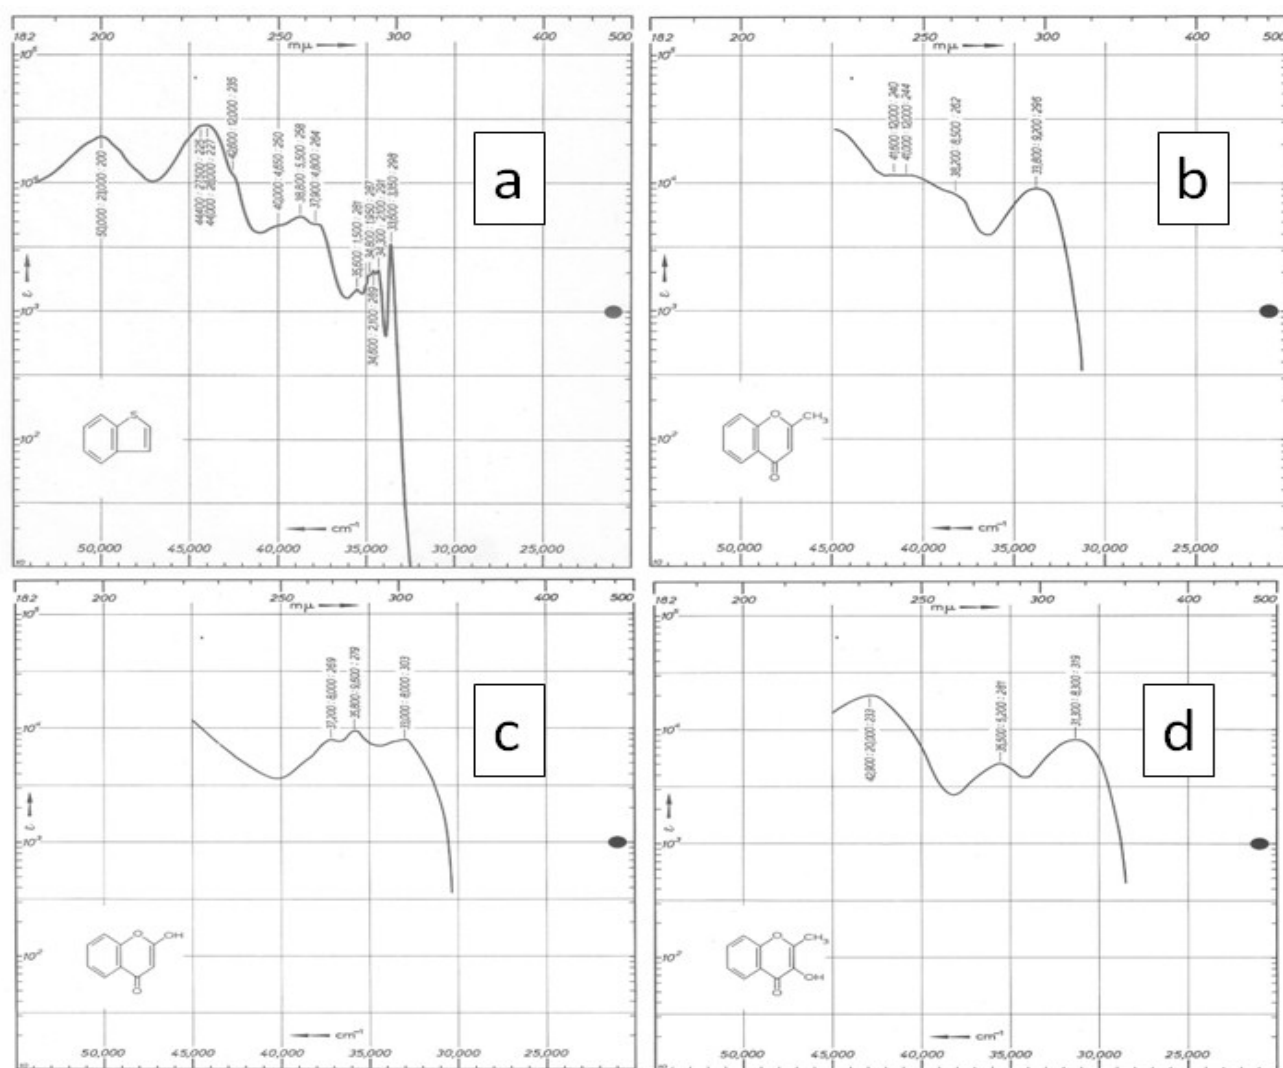

**Fig. S2** UV spectra of benzothiophene (a) and three simple chromenones in light petroleum (b-d) (from the UV Atlas of Organic Compounds, Verlag Chemie, 1966).

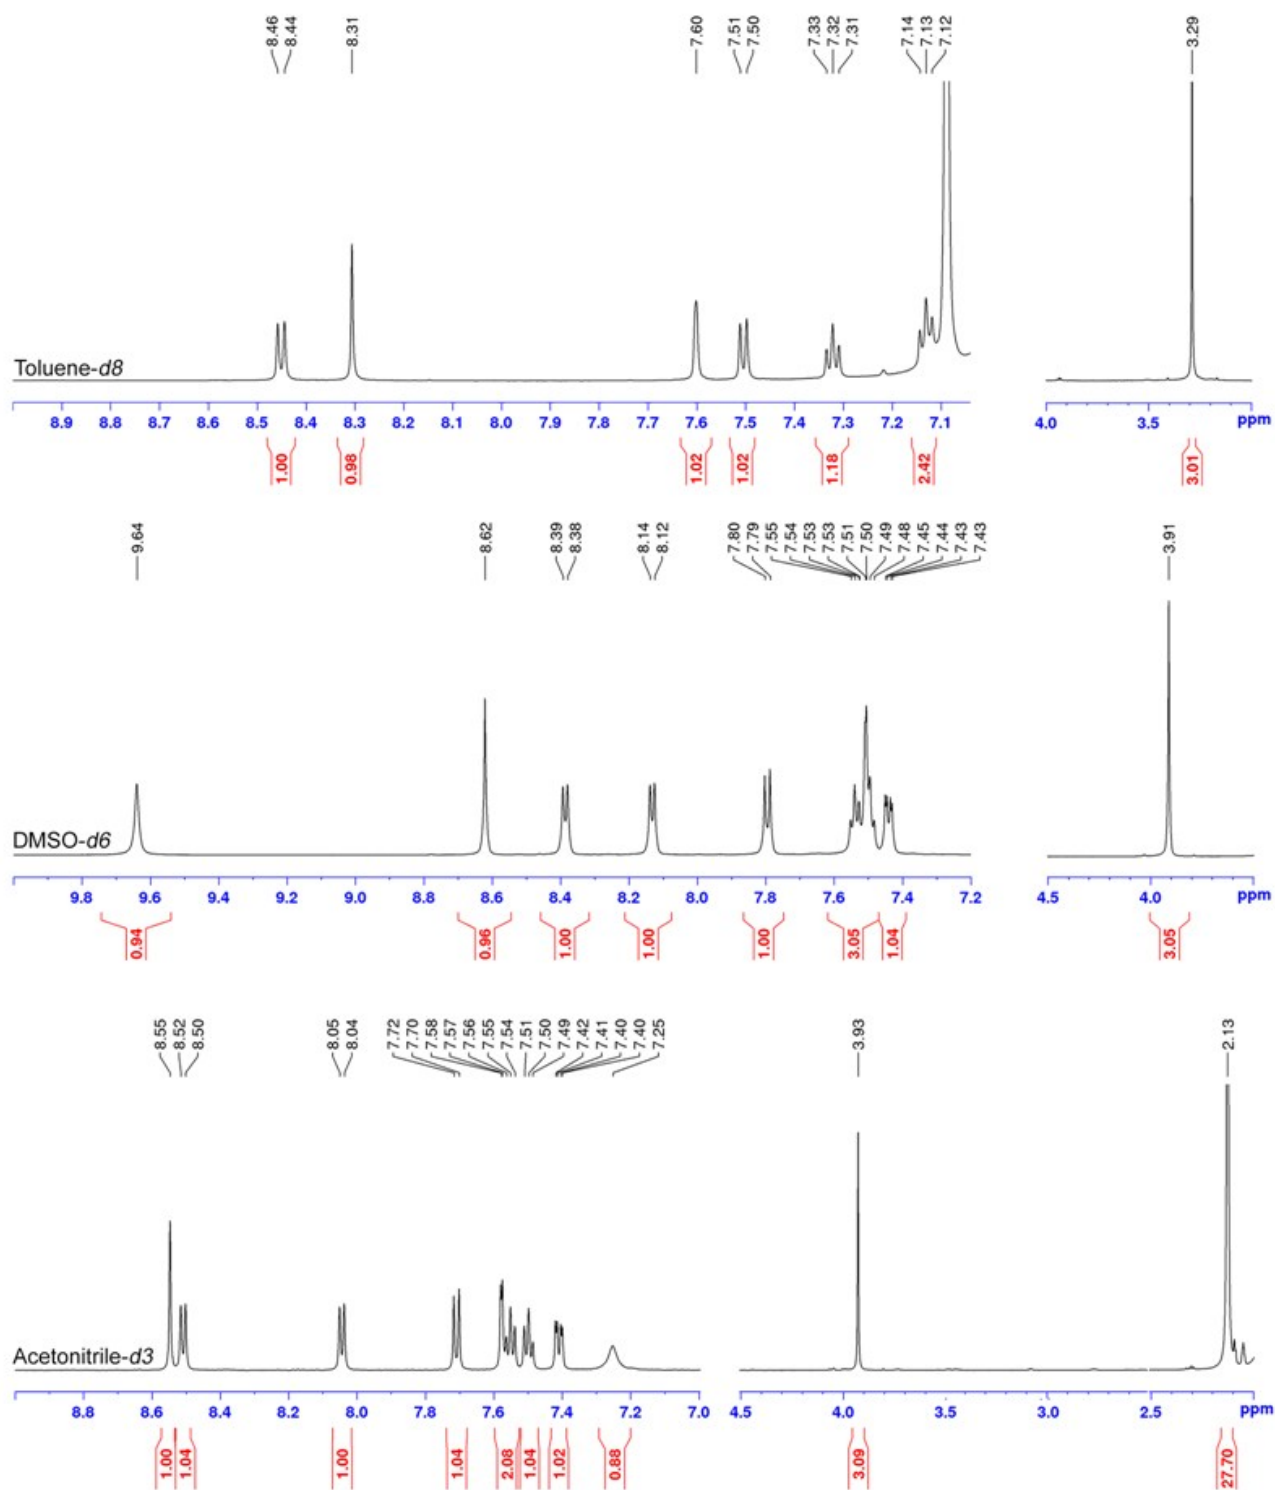

**Fig. S3**  $^1\text{H}$ -NMR spectra of compound CHBT in deuterated toluene, DMSO and acetonitrile.

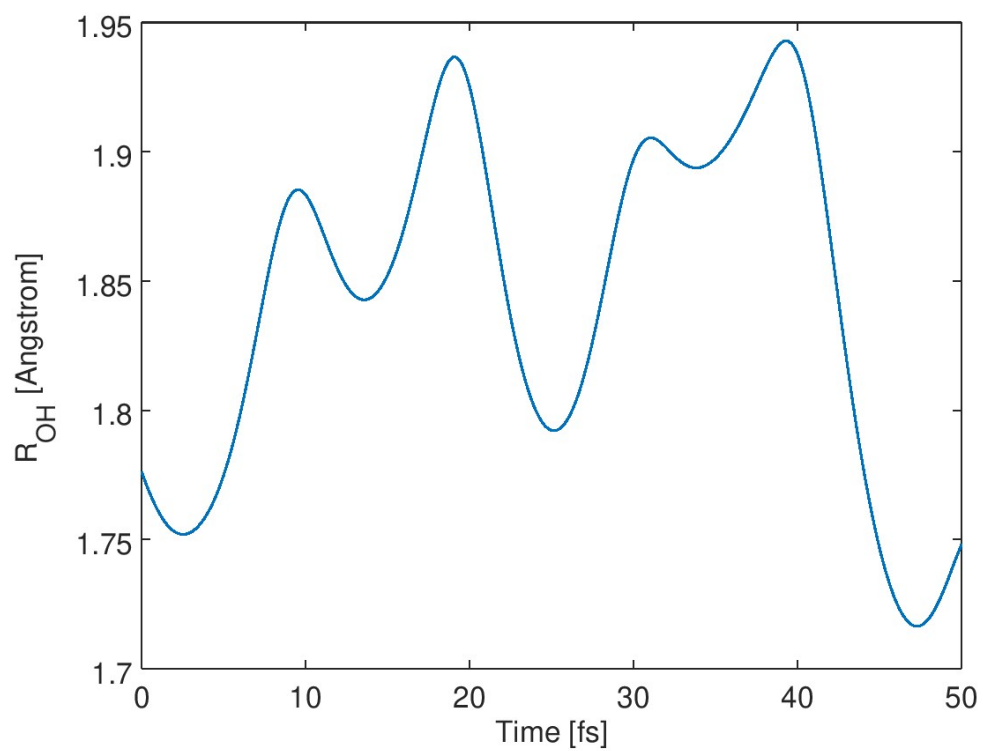

**Fig. S4** Time evolution of the O (carbonyl)-H distance obtained in the molecular dynamics run performed by initially assigning zero-point vibrational energies to all vibrational modes (condition *a* in the Computational section).

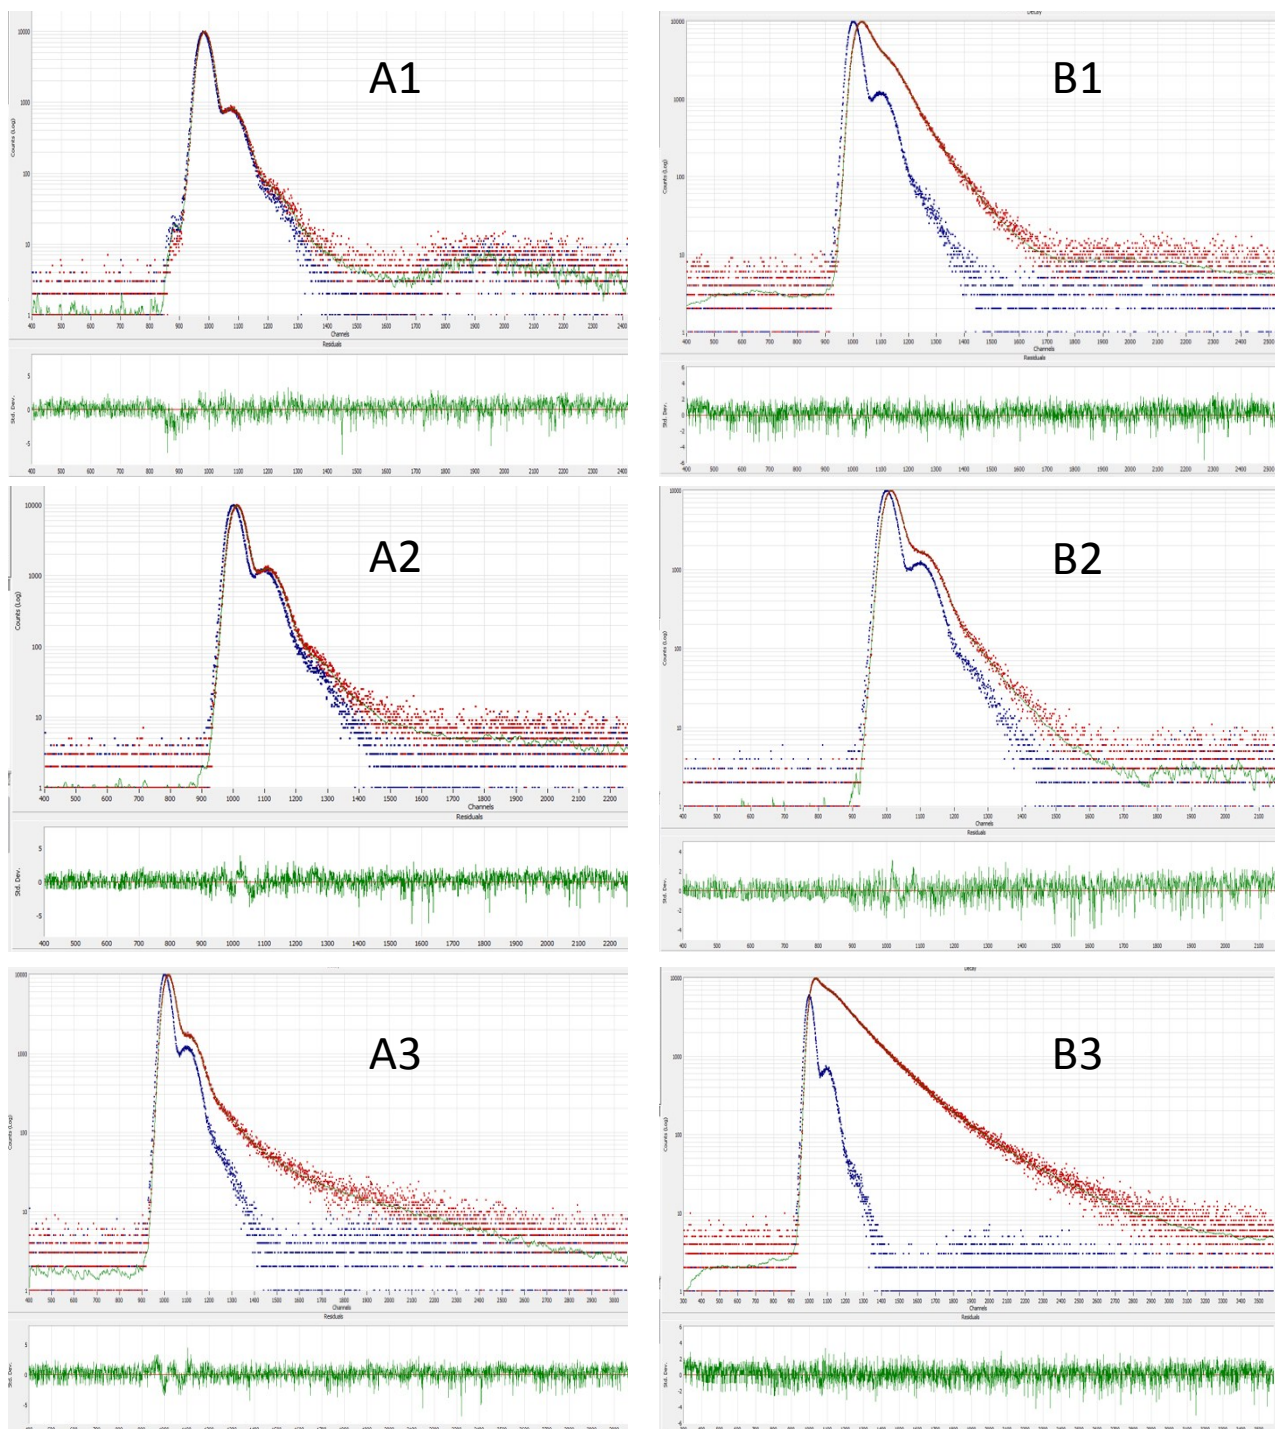

**Fig. S5** Semi-log plots of the time-decays of the emission of CHBT in different solvents. Blue dots, scattered excitation pulse; red dots, emission; green line, plot of the fitting curve and of the corresponding residuals. 1 channel  $\equiv$  27 ps.  $\lambda_{\text{exc}} = 340$  nm in all cases. A1, in DMSO,  $\lambda_{\text{em}} = 430$  nm; A2, in acetonitrile-water 1:2 mixture,  $\lambda_{\text{em}} = 440$  nm; A3, in the aqueous buffer,  $\lambda_{\text{em}} = 425$  nm,  $\tau_1 = 0.42$  ns (90%),  $\tau_2 = 3$  ns (5%),  $\tau_3 = 11$  ns (5%). B1, in cyclohexane,  $\lambda_{\text{em}} = 530$  nm,  $\tau_1 = 1.2$  ns (85%),  $\tau_2 = 3$  ns (15%); B2, in acetonitrile,  $\lambda_{\text{em}} = 540$  nm,  $\tau_1 = 0.17$  ns (64%),  $\tau_2 = 0.75$  ns (32%); B3, with 25  $\mu\text{M}$  BSA,  $\lambda_{\text{em}} = 530$  nm,  $\tau_1 = 1.15$  ns (12%),  $\tau_2 = 3.3$  ns (38%),  $\tau_3 = 5.4$  ns (40%),  $\tau_4 = 9$  ns (10%). The fitting lifetimes of the decays in A1 and A2 are shorter than the instrumental resolution (0.15 ns).
